# Supplementary material for: Understanding extreme-wave hazards on high-energy coasts requires a standardised approach to field data collection: Analysis and recommendations
Source: Copernicus journal article supplement (doi:10.5194/egusphere-2025-1913), 2025-06-18
Supplement: Supplementary file 1 [file egusphere-2025-1913-supplement.pdf]

Printable version of Table 1, for use as a field-planning checklist: Recommended core data for coastal boulder deposit studies. Abbreviations: GPS = Global Positioning System; GNSS = Global Navigation Satellite System; DGPS or DGNSS = Differential GPS or GNSS; RTK = Real Time Kinematic; UAV = Uncrewed Aerial Vehicle or drone; DTM = Digital Terrain Model

| Property                                          | What is included                                                                                                                                                                         | How it is measured/recorded                                                                                                                                                           |
|---------------------------------------------------|------------------------------------------------------------------------------------------------------------------------------------------------------------------------------------------|---------------------------------------------------------------------------------------------------------------------------------------------------------------------------------------|
| Site characteristics                              | Bedrock geology, topography, etc.                                                                                                                                                        | Site observations, literature analysis, and/or existing maps                                                                                                                          |
| General boulder characteristics                   | Lithology, source, transport history (where possible), as well as overall setting; overall shape and rounding                                                                            | Field observation comparative analysis over time, and/or literature review for previously studied sites                                                                               |
| Location                                          | Latitude and longitude, Universal Transverse Mercator, or other coordinate system (with horizontal geodetic datum defined)                                                               | GPS: hand held or from UAV imagery, or via RTK or DGPS/DGNSS survey. Location precision must be reported                                                                              |
| Physical properties                               | Density (for mass calculation)                                                                                                                                                           | Hand sample and Archimedes' principle                                                                                                                                                 |
| Dimensions                                        | Long, intermediate and short axes (X, Y, Z), volume; mass estimates from volume and density                                                                                              | Tape measurement, photogrammetry (structure-from-motion), DGPS/DGNSS, LiDAR                                                                                                           |
| Mass                                              | Estimate of boulder weight                                                                                                                                                               | Calculated from volume and density                                                                                                                                                    |
| Alignment                                         | Orientation of the long axis (azimuth and/or relative to shoreline or mean wave approach direction)                                                                                      | RTK GPS, compass, aerial photos                                                                                                                                                       |
| Horizontal distance                               | Distance inland from defined local datum (usually measured perpendicular to the shoreline)                                                                                               | RTK GPS or DGPS/DGNSS, laser rangefinder (with trigonometry if terrain is sloped), maps, imagery                                                                                      |
| Elevation                                         | Vertical distance above a defined datum                                                                                                                                                  | RTK GPS or DGPS/DGNSS, laser rangefinder with trigonometry, DTMs                                                                                                                      |
| Geodetic reference system                         | For positional data, the geodetic frame of reference (e.g. WGS84, ETRS89, etc.)                                                                                                          | From GPS settings                                                                                                                                                                     |
| Local datum for horizontal distance and elevation | Some measure of sea level (with information for reproducibility), high water mark (specify how recognised), or other reproducible landmark; national geodetic benchmark or survey datums | Depends on datum (see text)                                                                                                                                                           |
| Tide information                                  | Local range, local tide corrections (if relevant for boulder elevation computations)                                                                                                     | Local hydrographic office tidal predictions, phone apps (apps will usually only have nearest gauge data, not progressive time-distance correction factors), or numerical tidal models |
